# Supplementary material
Source: Springer Nature journal article supplement (https://www.springermedizin.de/resource/supplementary/12883_2013_1050_MOESM5_ESM.pdf/9456424)
Supplement: MOESM5 [file 9456424]

Supplemental table 5. Proportional odds logistic regression analyses using quartiles of cystatin C and estimated GFR in the group with deep or infratentorial CMBs

| Variables                  | N   | unadjusted OR | 95% CI     | <i>p</i> | adjusted OR | 95% CI     | <i>p</i> |
|----------------------------|-----|---------------|------------|----------|-------------|------------|----------|
| Quartiles of Cystatin C    |     |               |            |          |             |            |          |
| Q4( $\geq 66.7$ )          | 45  | 5.00          | 1.30-1.91  | 0.02     | 5.63        | 1.01-31.67 | 0.04     |
| Q3(54.7-66.7)              | 39  | 1.50          | 0.51-4.34  | 0.46     | 1.35        | 0.30-5.91  | 0.69     |
| Q2(47.2-54.7)              | 23  | 1.00          | 0.40-2.28  | 0.93     | 1.01        | 0.31-3.32  | 0.97     |
| Q1( $\leq 47.2$ ), ref     | 28  |               |            |          |             |            |          |
| <i>p</i> for trend         |     |               |            | 0.02     |             |            | 0.04     |
| Quartiles of estimated GFR |     |               |            |          |             |            |          |
| Q4( $\leq 66.1$ )          | 5   | 1.16          | 0.13-10.14 | 0.90     | 1.18        | 0.10-14.35 | 0.89     |
| Q3(66.1-78.8)              | 11  | 1.15          | 0.29-4.46  | 0.83     | 0.43        | 0.10-2.70  | 0.37     |
| Q2(78.8-94.7)              | 16  | 0.78          | 0.26-2.27  | 0.65     | 0.77        | 0.17-3.49  | 0.74     |
| Q1( $\geq 94.7$ ),ref      | 103 |               |            |          |             |            |          |
| <i>p</i> for trend         |     |               |            | 0.95     |             |            | 0.67     |

\*adjusted for the covariates:age, sex, total cholesterol, diabetes, hypertension, dyslipidemia, previous heart disease, smoking, previous anti thrombotic or anticoagulant use and white matter lesions
